# Supplementary material for: Vascularized dental pulp regeneration using cell-laden microfiber aggregates
Source: Royal Society of Chemistry journal article supplement (doi:10.1039/d2tb01825j), 2022-01-01
Supplement: d2tb01825j1.pdf [file d2tb01825j1.pdf]

## Vascularized dental pulp regeneration using cell-laden microfiber aggregates

*Qingqing Liang<sup>a,b,c</sup>, Cheng Liang<sup>a,b,c</sup>, Xiaojing Liu<sup>a,b,c</sup>, Xiaotao Xing<sup>a,b,c</sup>, Shixing Ma<sup>a,b,c</sup>, Haisen Huang<sup>a,b,c</sup>, Chao Liang<sup>a,b,c</sup>, Lei Liu<sup>a,c</sup>, Li Liao<sup>a,b,\*</sup>, Weidong Tian<sup>a,b,c,\*</sup>*

*<sup>a</sup> State Key Laboratory of Oral Diseases & National Clinical Research Center for Oral Diseases, West China Hospital of Stomatology, Sichuan University, Chengdu, Sichuan 610041, China*

*<sup>b</sup> National Engineering Laboratory for Oral Regenerative Medicine & Engineering Research Center of Oral Translational Medicine, Ministry of Education, West China Hospital of Stomatology, Sichuan University, Chengdu, Sichuan 610041, China.*

*<sup>c</sup> Department of Oral and Maxillofacial Surgery, West China Hospital of Stomatology, Sichuan University, Chengdu 610041, China*

**\*Corresponding authors.**

### **Li Liao**

West China Hospital of Stomatology, Sichuan University, No. 14, 3rd Section, Renmin South Road, Chengdu 610041, PR China

Tel: +86-28- 85503499

Email: [lliao@scu.edu.cn](mailto:lliao@scu.edu.cn)

### **Weidong Tian**

West China Hospital of Stomatology, Sichuan University, No. 14, 3rd Section, Renmin South Road, Chengdu 610041, PR China.

Tel: +86-28-85503499

E-mail: [drtwd@sina.com](mailto:drtwd@sina.com)

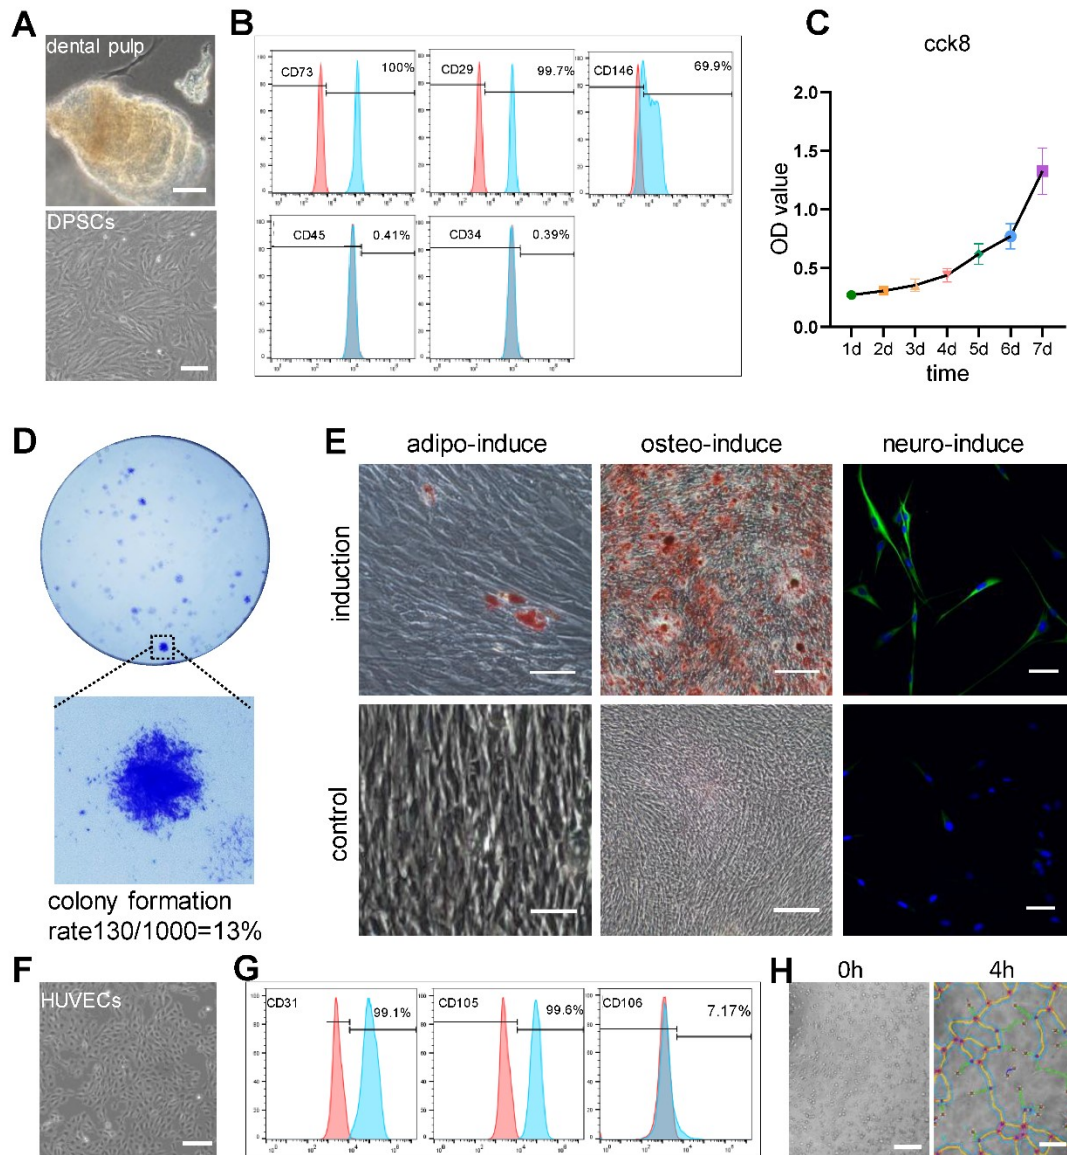

**Figure S1.** Identification of DPSCs and HUVECs. (A) DPSCs isolated from human pulp tissue. Scale bars, 100 $\mu$ m. (B) The expressions of CD73, CD29, CD146, CD34, and CD45 in DPSCs detected by flow cytometry. (C) The curve of DPSCs proliferation measured by cck8 assay from day 1 to day 7. (D) Clone formation assay of DPSCs for evaluating self-renewal capacity. (E) Alizarin red and oil red staining of DPSCs after osteogenic and adipogenic induction for 21 days. Tubulin  $\beta$ III immunofluorescence staining after neurogenic induction of DPSCs for 24 hours. Scale bars, 50 $\mu$ m. (F) HUVECs (Passage 5) isolated from human umbilical vein. Scale bars, 200 $\mu$ m. (G) Flow

cytometry identified expression CD31, CD105, and CD106 in HUVECs. (H)  
Angiogenesis experiment of HUVECs for 4 hours. Scale bars, 200 $\mu$ m.

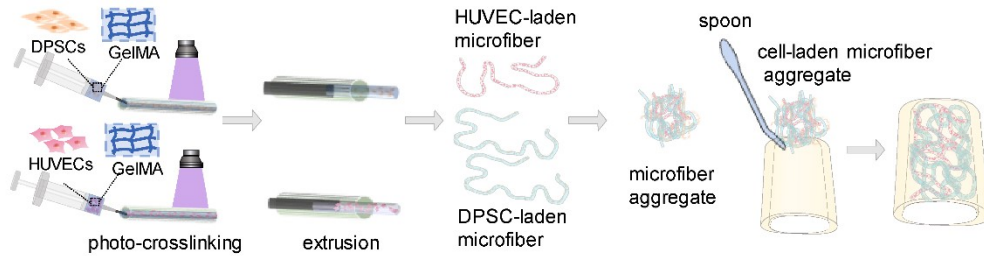

**Figure S2.** Technical diagram of the preparation of microfiber aggregates and implantation of them into the root of a tooth (Figure S2).

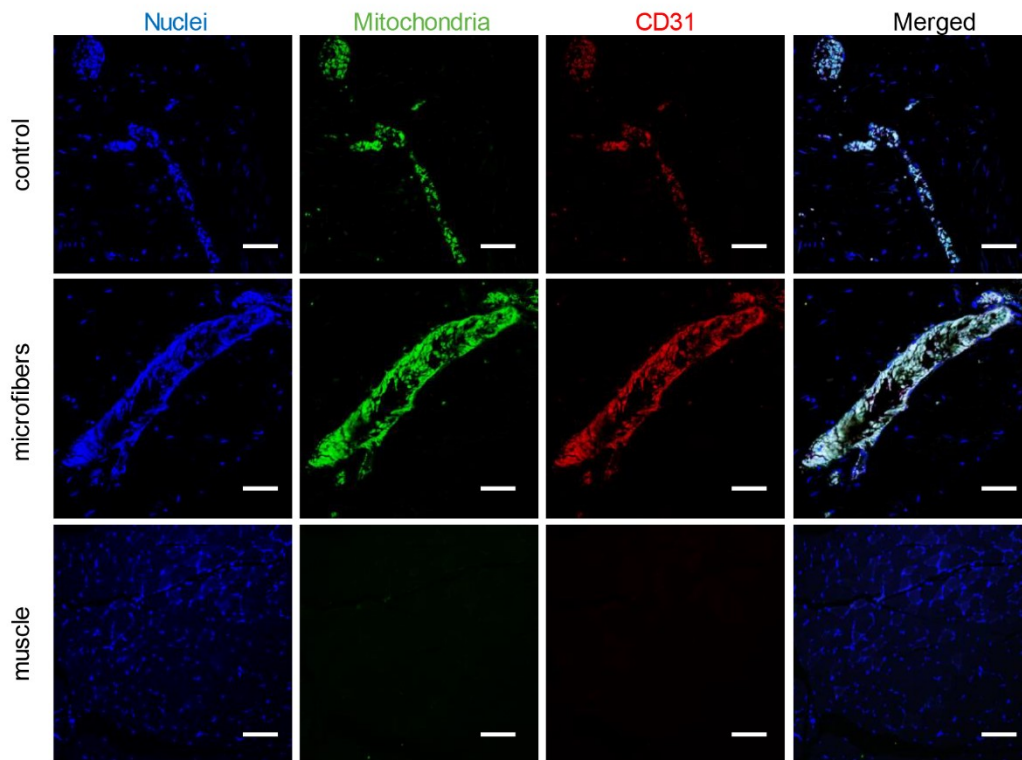

**Figure S3.** Angiogenesis in new pulp-like tissue.
